# Supplementary material for: Electrical activity controls area-specific expression of neuronal apoptosis in the mouse developing cerebral cortex
Source: eLife. 2017 Aug 21;6:e27696. doi: 10.7554/eLife.27696 (PMC5582867; doi:10.7554/eLife.27696)
Supplement: Figure 3—source data 3. — n = number of slices analyzed; sd = standard deviation; sem = standard error of mean. [file elife-27696-fig3-data3.docx]

Figure 3C. Quantitative analysis of the density of apoptotic cells in layers I-IV, V and VI of P1-3 mouse neocortex. n=number of slices analyzed; sd= standard deviation; sem= standard error of mean.

| |  | **P1-3, layers I-IV** | | | | | --- | --- | --- | --- | --- | | **sectors** | **mean** | **n** | **sd** | **sem** | | **a** | 12,0177 | 12 | 11,24685 | 3,246685 | | **b** | 8,865866 | 12 | 11,00996 | 3,178301 | | **c** | 7,493504 | 12 | 8,372054 | 2,416804 | | **d** | 9,060582 | 12 | 8,569607 | 2,473832 | | **e** | 9,711147 | 12 | 11,76739 | 3,396953 | | **f** | 7,415105 | 12 | 10,12496 | 2,922824 | |  |
| --- | --- | --- | --- | --- | --- | --- | --- | --- | --- | --- | --- | --- | --- | --- | --- | --- | --- | --- | --- | --- | --- | --- | --- | --- | --- | --- | --- | --- | --- | --- | --- | --- | --- | --- | --- | --- | --- | --- | --- | --- | --- |
|  |  |
|  |  |  |  |  |
| |  | **P1-3, layer V** | | | | | --- | --- | --- | --- | --- | | **sectors** | **mean** | **n** | **sd** | **sem** | | **a** | 16,51036 | 12 | 13,3861 | 3,864233 | | **b** | 10,66181 | 12 | 11,36085 | 3,279594 | | **c** | 10,76256 | 12 | 9,131187 | 2,635947 | | **d** | 9,266871 | 12 | 11,55017 | 3,334246 | | **e** | 15,89826 | 12 | 13,33446 | 3,849328 | | **f** | 11,60493 | 12 | 14,03655 | 4,052002 | |  |  |  |  |
|  |  |  |  |  |
|  |  |  |  |  |
| |  | **P1-3, layer VI** | | | | | --- | --- | --- | --- | --- | | **sectors** | **mean** | **n** | **sd** | **sem** | | **a** | 5,316711 | 5 | 4,953786 | 2,2154 | | **b** | 7,764674 | 5 | 9,213701 | 4,120492 | | **c** | 4,810178 | 5 | 7,030871 | 3,144301 | | **d** | 6,226521 | 5 | 6,530019 | 2,920313 | | **e** | 15,06111 | 5 | 24,39271 | 10,90875 | | **f** | 11,7547 | 5 | 12,18071 | 5,447381 | |  |  |  |  |
