# Supplementary material for: Electrical activity controls area-specific expression of neuronal apoptosis in the mouse developing cerebral cortex
Source: eLife. 2017 Aug 21;6:e27696. doi: 10.7554/eLife.27696 (PMC5582867; doi:10.7554/eLife.27696)
Supplement: Figure 4—source data 1. [file elife-27696-fig4-data1.xlsx]

## Sheet: Fig 4D1 - spectral power
	spectral power of S1 activity, urethane-anesthetized mice
frequency (Hz)	0	0.2	0.4	0.6	0.8	1	1.2	1.4	1.6	1.8	2	2.2	2.4	2.6	2.8	3	3.2	3.4	3.6	3.8	4	4.2	4.4	4.6	4.8	5	5.2	5.4	5.6	5.8	6	6.2	6.4	6.6	6.8	7	7.2	7.4	7.6	7.8	8	8.2	8.4	8.6	8.8	9	9.2	9.4	9.6
mean (FFT power)	6823.82	20831.8	62556.2	134916	174004	268887	244867	235005	264250	201976	173539	183746	128251	124560	126259	109153	104371	87757.9	83817.6	86694	66706.2	61874.2	68962.9	71962.9	53350.7	56451.2	49604.2	54594.9	50834.3	51238.3	43427.2	53436.8	46839.3	37932.6	44131.2	34598.1	31204.5	31740.6	31846.4	32346	38304	41081.7	37567.5	31009.9	31937.1	25334.9	24042.2	29483.4	30052.9
n	5	5	5	5	5	5	5	5	5	5	5	5	5	5	5	5	5	5	5	5	5	5	5	5	5	5	5	5	5	5	5	5	5	5	5	5	5	5	5	5	5	5	5	5	5	5	5	5	5
sd	6128.66	15689.7	20525.5	71711	60288.2	186569	107040	146087	133300	94484.8	45557.2	71391.4	34687.7	46204.5	44169.3	38036.7	37924.6	30072.8	26770.3	26328	28061.2	16459.1	18358	26458.6	19570.9	27013.1	17707.8	18515.3	12806.3	14093.6	16196.4	21950.2	16243.6	10981.5	10764.7	8390.72	9132.16	11344.9	13059.2	11423.8	11316	17762	19533.8	16931.9	17584.9	8716.5	8643.97	7927.88	8891.35
sem	2740.82	7016.64	9179.3	32070.1	26961.7	83436.2	47869.7	65332	59613.5	42254.9	20373.8	31927.2	15512.8	20663.3	19753.1	17010.5	16960.4	13449	11972	11774.2	12549.3	7360.71	8209.96	11832.6	8752.38	12080.6	7919.17	8280.29	5727.15	6302.85	7243.25	9816.42	7264.36	4911.09	4814.13	3752.44	4084.03	5073.58	5840.24	5108.86	5060.69	7943.39	8735.79	7572.18	7864.19	3898.14	3865.7	3545.45	3976.33
	spectral power of M1 activity, urethane-anesthetized mice
frequency (Hz)	0	0.2	0.4	0.6	0.8	1	1.2	1.4	1.6	1.8	2	2.2	2.4	2.6	2.8	3	3.2	3.4	3.6	3.8	4	4.2	4.4	4.6	4.8	5	5.2	5.4	5.6	5.8	6	6.2	6.4	6.6	6.8	7	7.2	7.4	7.6	7.8	8	8.2	8.4	8.6	8.8	9	9.2	9.4	9.6
mean (FFT power)	793.558	1916.83	14231.8	25599.7	47715.6	53547.9	71259.2	44393.2	41028	34546.3	36702.5	38162.6	35304.8	26116.4	27673.7	32148.8	26437.6	24064.3	27253.8	23069.5	21277.2	16776.5	16716.1	19524.2	17074.8	16550.8	15563.1	16670.2	17425.2	20075.7	13403.4	15389.9	15408	15079.4	14140.8	14448.6	11943.3	11471.2	9914.87	12072.9	10145.1	8616	8341.13	7603.79	7625.16	8847.07	8823.42	5780.31	5653.32
n	5	5	5	5	5	5	5	5	5	5	5	5	5	5	5	5	5	5	5	5	5	5	5	5	5	5	5	5	5	5	5	5	5	5	5	5	5	5	5	5	5	5	5	5	5	5	5	5	5
sd	568.945	1336.43	10163.1	25176.4	63782	75331.8	115846	62386	56920.9	43751.5	51669.9	55607.4	42563.6	30774.4	34207.1	37937.4	32193	31069.7	34820	28449.5	26408.9	19069.1	20088.9	22881.7	17949.5	15866.3	14815.4	19834.2	23013.8	24516.5	12751.3	16204.9	16991.8	16076.2	18118.1	16156.1	12693.9	13298	12182.3	16918.2	14038.7	12086.2	10658.9	7866.09	9107.64	9827.33	12100.3	6766.17	6411.53
sem	254.44	597.668	4545.09	11259.2	28524.2	33689.4	51807.8	27899.9	25455.8	19566.3	23107.5	24868.4	19035	13762.7	15297.9	16966.1	14397.1	13894.8	15572	12723	11810.4	8527.96	8984.01	10233	8027.26	7095.65	6625.65	8870.11	10292.1	10964.1	5702.56	7247.04	7598.97	7189.5	8102.64	7225.24	5676.87	5947.02	5448.11	7566.03	6278.29	5405.12	4766.81	3517.82	4073.06	4394.92	5411.41	3025.92	2867.32
[truncated: 352 more columns]

## Sheet: Fig 4D2 - sum spectral power
S1 activity, urethane-anesthetized mice
frequency bands	mean	n	sd	sem
delta	2888973	5	966125	432064
theta	944680	5	258008	115385
alpha	641331	5	214302	95838.6
beta	911400	5	374698	167570
gamma	314301	5	105598	47225.1
M1 activity, urethane-anesthetized mice
frequency bands	mean	n	sd	sem
delta	653243	5	852721	381348
theta	299794	5	340873	152443
alpha	153452	5	179885	80447.1
beta	183365	5	214455	95907.3
gamma	70017.5	5	52008.6	23258.9

## Sheet: Fig 4D3 - trough frequency
		S1	M1
trough frequency (/min)	mouse #1	147	19.3333
	mouse #2	103.333	76.6667
	mouse #3	167.667	28
	mouse #4	93.6667	48.6667
	mouse #5	267.667	143.667
	mean	155.867	63.2667
	n	5	5
	sd	69.5444	50.0768
	sem	31.1012	22.395
