# Supplementary material for: Electrical activity controls area-specific expression of neuronal apoptosis in the mouse developing cerebral cortex
Source: eLife. 2017 Aug 21;6:e27696. doi: 10.7554/eLife.27696 (PMC5582867; doi:10.7554/eLife.27696)
Supplement: Figure 4—source data 2. [file elife-27696-fig4-data2.xlsx]

## Sheet: Fig 4E1 - spectral power
	spectral power of S1 activity, non-anesthetized mice
frequency (Hz)	0	0.2	0.4	0.6	0.8	1	1.2	1.4	1.6	1.8	2	2.2	2.4	2.6	2.8	3	3.2	3.4	3.6	3.8	4	4.2	4.4	4.6	4.8	5	5.2	5.4	5.6	5.8	6	6.2	6.4	6.6	6.8	7	7.2	7.4	7.6	7.8	8	8.2	8.4	8.6	8.8	9	9.2	9.4	9.6
mean (FFT power)	13332.4	35665.2	149752	352503	456475	544132	561071	575531	476401	531976	409148	344136	306808	258821	248443	228910	159600	176317	177605	143450	113770	125266	121489	106891	115251	96096.6	88250.3	93800.1	77390.2	79033.6	79538.9	78065.4	55628.3	64194.8	56679.9	53934.6	59161.2	57101.3	41696	59408.6	52777	52282.8	49066.3	48281.1	47546.9	50882.3	40542.2	35427.6	37220
n	5	5	5	5	5	5	5	5	5	5	5	5	5	5	5	5	5	5	5	5	5	5	5	5	5	5	5	5	5	5	5	5	5	5	5	5	5	5	5	5	5	5	5	5	5	5	5	5	5
sd	8546.86	22931.8	130864	275907	349744	382467	468868	398888	248564	366401	241128	201747	247900	197683	178860	209305	129402	152115	165906	101932	104719	97844	107429	63735.4	101644	77543.1	66378.7	90161	72382.7	74359.8	93377	81537.9	48172.5	50699.7	53340.7	46685.8	60275	63721.1	35214.6	63585.9	54020.9	46392.4	56992.3	54101.6	39773.6	60095.8	32465.6	25455.8	28898.2
sem	3822.27	10255.4	58524.3	123389	156410	171045	209684	178388	111161	163859	107836	90223.9	110864	88406.6	79988.6	93603.9	57870.4	68027.9	74195.2	45585.5	46831.6	43757.2	48043.7	28503.3	45456.8	34678.3	29685.4	40321.2	32370.5	33254.7	41759.4	36464.9	21543.4	22673.6	23854.7	20878.5	26955.8	28496.9	15748.5	28436.5	24158.9	20747.3	25487.7	24195	17787.3	26875.7	14519.1	11384.2	12923.7
	spectral power of M1 activity, non-anesthetized mice
frequency (Hz)	0	0.2	0.4	0.6	0.8	1	1.2	1.4	1.6	1.8	2	2.2	2.4	2.6	2.8	3	3.2	3.4	3.6	3.8	4	4.2	4.4	4.6	4.8	5	5.2	5.4	5.6	5.8	6	6.2	6.4	6.6	6.8	7	7.2	7.4	7.6	7.8	8	8.2	8.4	8.6	8.8	9	9.2	9.4	9.6
mean (FFT power)	2070.79	4341.49	19118.8	56822.6	100052	131464	159327	151675	147615	139975	137547	122092	104843	97616.8	87819.7	81710.4	65148.2	60377.8	58058.7	55689.5	43059.3	41206.9	39853.2	41030.5	34021.8	32213.7	29767.7	24737.5	25242.4	25190.7	19956	21232.9	17831.1	19145.5	17450	15772.2	14165.8	14105.1	11560	10584.7	12031	8766.23	8684.55	9172.65	8062.54	7594.65	7850.14	8963.03	8541.58
n	5	5	5	5	5	5	5	5	5	5	5	5	5	5	5	5	5	5	5	5	5	5	5	5	5	5	5	5	5	5	5	5	5	5	5	5	5	5	5	5	5	5	5	5	5	5	5	5	5
sd	3020.34	5402.81	18554.7	57567	94179.5	128688	145480	139380	143509	138387	127822	121639	106543	104941	83917.2	76472.7	61351.6	58512.8	49692.9	48048.3	39439.5	36837.3	30838.6	32263.6	28158.7	22638	20833.8	15874.4	17837.2	11326.3	11519.4	11518	9829.94	10954.2	11176.5	9529.3	9991.61	8667.16	7381.49	6416.22	9809.92	5043.45	5873.66	6630.33	4601.62	5092.01	7109.51	7808.98	9340.2
sem	1350.74	2416.21	8297.92	25744.7	42118.4	57551.2	65060.5	62332.5	64179.1	61888.5	57163.9	54398.7	47647.3	46931.1	37528.9	34199.6	27437.3	26167.7	22223.4	21487.9	17637.9	16474.2	13791.4	14428.7	12593	10124	9317.17	7099.26	7977.05	5065.26	5151.61	5151.01	4396.08	4898.86	4998.28	4261.63	4468.38	3876.07	3301.1	2869.42	4387.13	2255.5	2626.78	2965.17	2057.91	2277.22	3179.47	3492.28	4177.06
[truncated: 352 more columns]

## Sheet: Fig 4E2 - sum spectral power
S1 activity, non-anesthetized mice
frequency bands	mean	n	sd	sem
delta	6.26385e+06	5	4.02272e+06	1.79902e+06
theta	1.56165e+06	5	1.3861e+06	619883
alpha	831086	5	681701	304866
beta	895974	5	537779	240502
gamma	297648	5	122588	54822.9
M1 activity, non-anesthetized mice
frequency bands	mean	n	sd	sem
delta	1.82643e+06	5	1.66389e+06	744113
theta	467099	5	295655	132221
alpha	151709	5	126073	56381.6
beta	206853	5	300084	134201
gamma	87238.2	5	95739.1	42815.8

## Sheet: Fig 4E3 - trough frequency
		S1	M1
trough frequency (/min)	mouse #1	214	139.333
	mouse #2	130.667	16.3333
	mouse #3	193.333	18.3333
	mouse #4	83	23.6667
	mouse #5	177.667	62
	mean	159.733	51.9333
	n	5	5
	sd	52.7454	52.2863
	sem	23.5885	23.3831
